# Supplementary material
Source: PubMed Central journal article supplement (PMC7065521)
Supplement: NIHMS1549707-supplement-2.pdf [file NIHMS1549707-supplement-2.pdf]

# Supplemental Figure S1

**A**

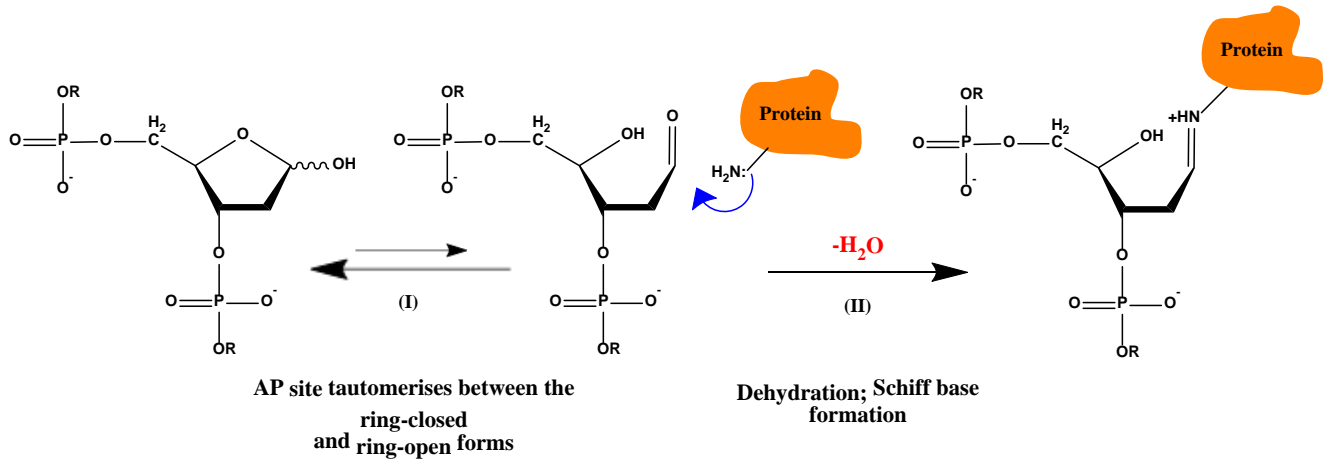

**B**

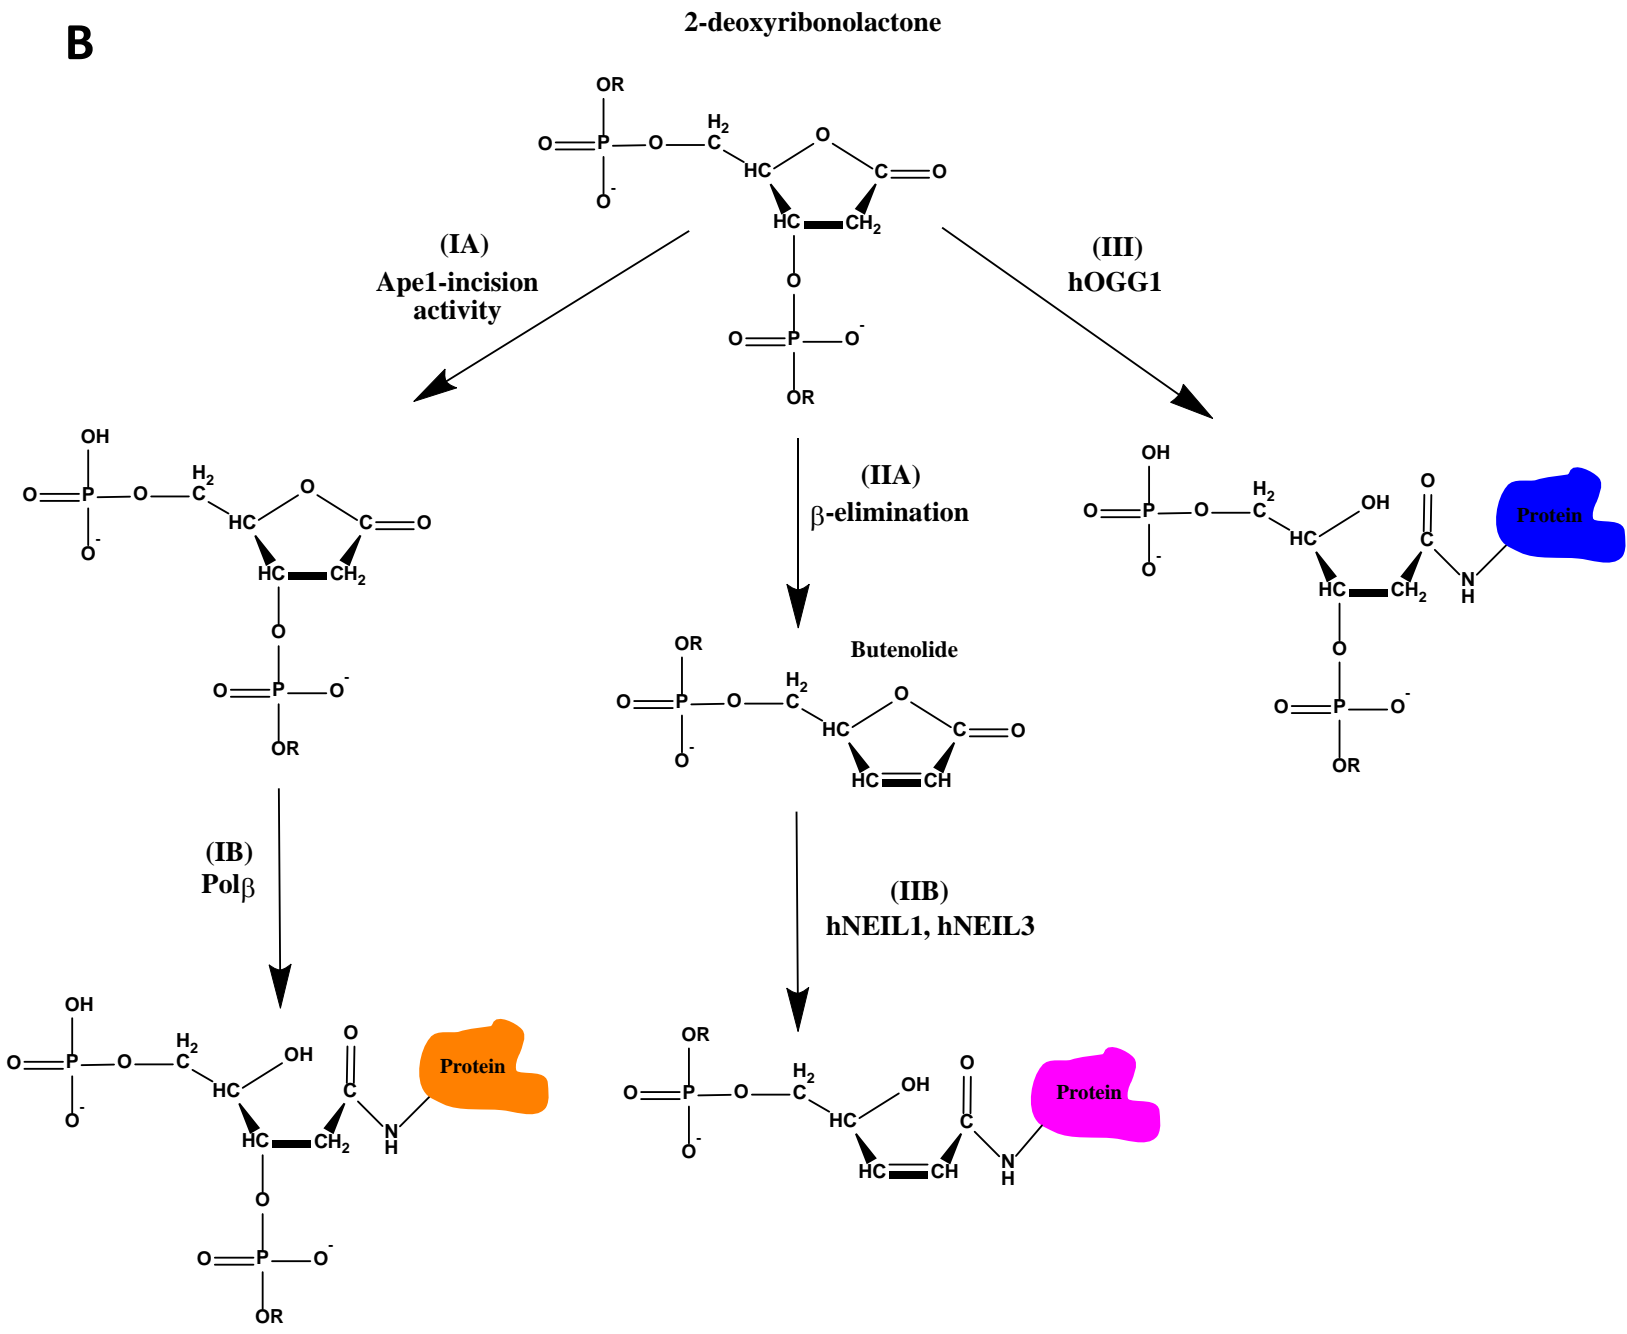

# Supplemental Figure S2

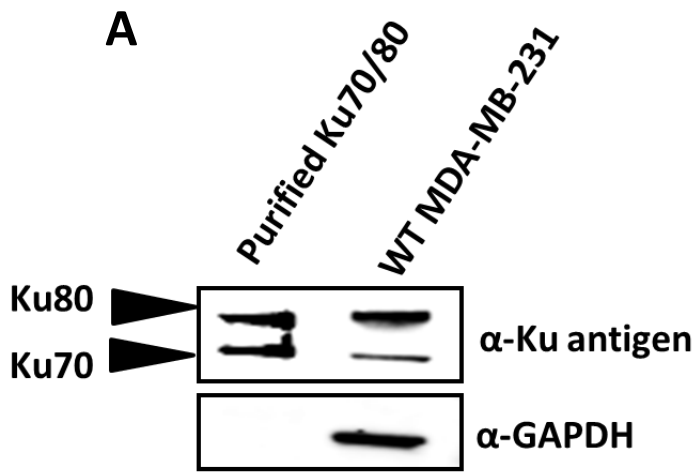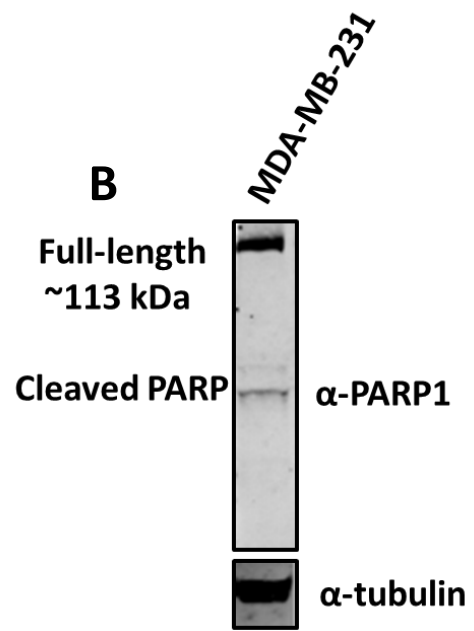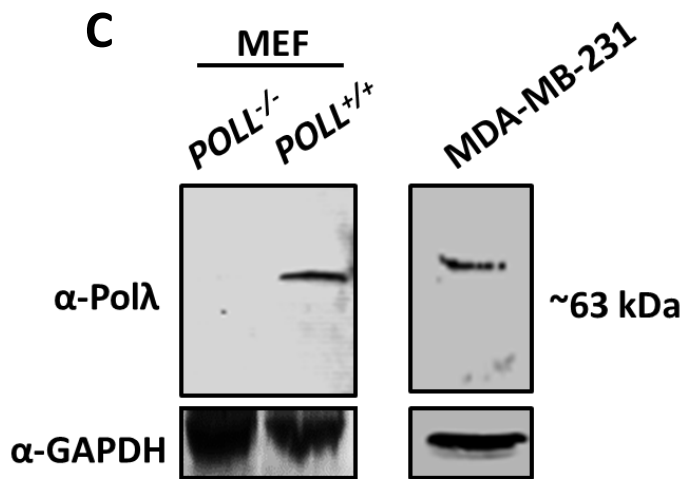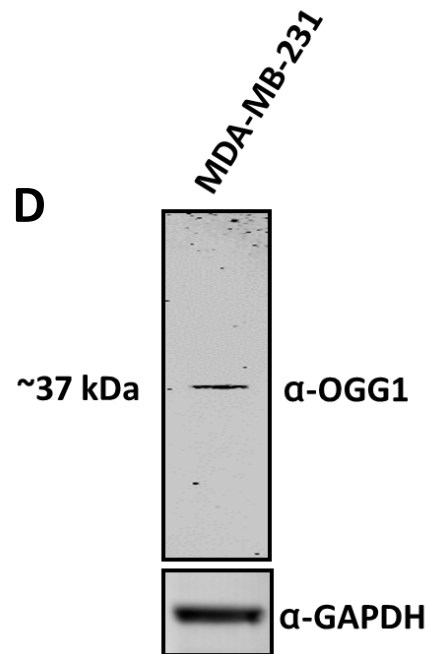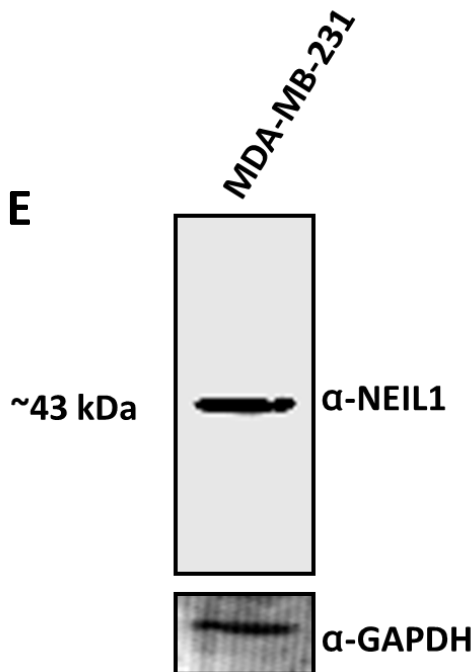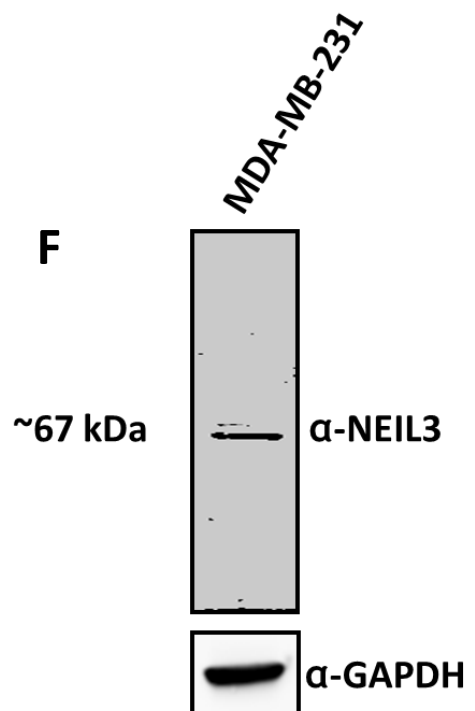

# Supplemental Figure S3

## MDA-MB-231

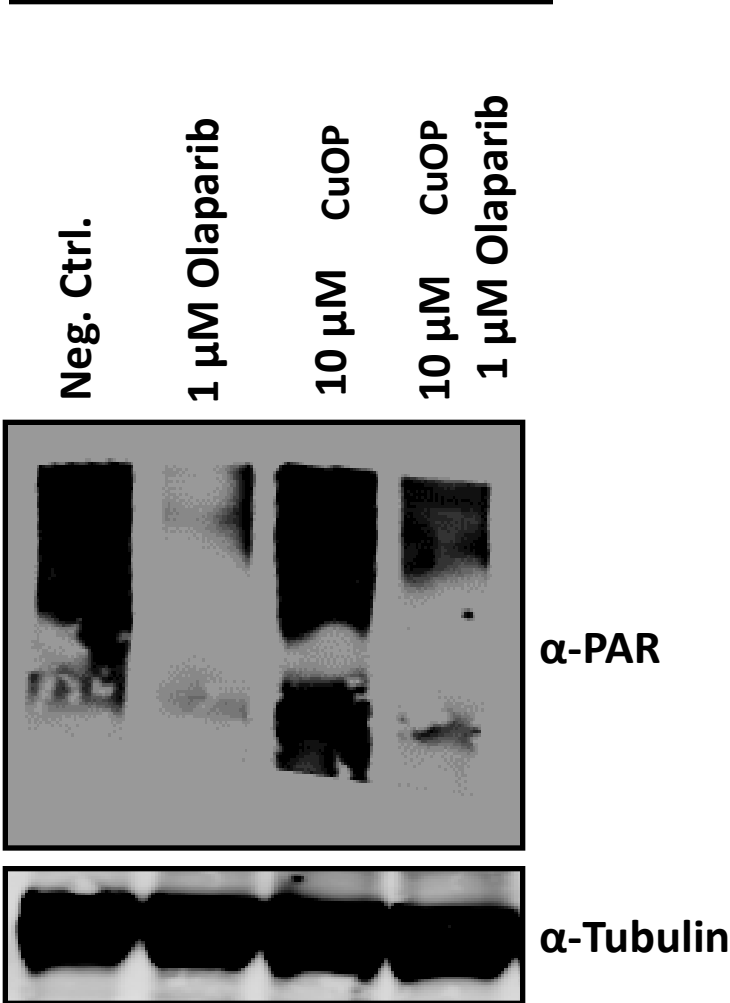

# Supplemental Figure Legends

**Figure S1. Trapping of BER AP Lyases in DPC. A.** Schematic showing reaction mechanism for trapping 5'-dRp/AP lyases in DPC with sodium borohydride ( $\text{NaBH}_4$ ). **B.** Trapping of 5'-dRp/AP lyases by dL residues.

**Figure S2. Confirmation of AP Lyase Expression.** Whole cell extracts were prepared from MDA-MB-231 cells (**A.**, **B.**, **D.-F.**) or MEF cells (**C.**) as described in the material and methods section, then 50  $\mu\text{g}$  of total protein were resolved by SDS-PAGE, and electroblotted onto PVDF membranes. Membranes were then blocked in 3% BSA, then probed using specific anti-sera raised against either **A.** the Ku 70/80 heterodimer, **B.** PARP1, **C.** Pol $\lambda$ , **D.** OGG1, **E.** NEIL1, or **F.** NEIL3.

**Figure S3. PARylation in MDA-MB-231 Cells Following Olaparib Treatment with or without CuOP.** Cells were treated with 1  $\mu\text{M}$  olaparib in the presence or absence 10  $\mu\text{M}$  CuOP for 2 h, then whole cell extracts were prepared as described in the materials and methods section. For immunoblot analysis of PARylation, a total of 100  $\mu\text{g}$  of protein were resolved by SDS-PAGE, electroblotted onto PVDF membranes, then probed with anti-serum against PAR (1:500).
